# Supplementary material for: Paternal race/ethnicity and risk of adverse birth outcomes in the United States, 1989–2013
Source: PubMed Central journal article supplement (PMC6141552; doi:10.3934/publichealth.2018.3.312), 2018-08-16
Supplement: publichealth-05-03-312-s001.pdf [file publichealth-05-03-312-s001.pdf]

*Research article*

**Paternal race/ethnicity and risk of adverse birth outcomes in the United States, 1989–2013**

Yu Li<sup>1</sup>, Zhehui Luo<sup>2</sup>, Claudia Holzman<sup>2</sup>, Hui Liu<sup>3</sup> and Claire E. Margerison<sup>2,\*</sup>

<sup>1</sup> Department of Epidemiology, Brown University, USA

<sup>2</sup> Department of Epidemiology and Biostatistics, Michigan State University, USA

<sup>3</sup> Department of Sociology, Michigan State University, USA

\* **Correspondence:** Email: [margeris@msu.edu](mailto:margeris@msu.edu); Tel: +5173538623; Fax: +5173538623.

---

**Table S1.** Demographic characteristics by maternal/paternal race/ethnicity combination groups.

| Maternal characteristics | Maternal/Paternal race/ethnicity combination <sup>1</sup> |      |      |      |      |      |      |      |      |      |      |      |      |      |      |      |      |      |      |      |
|--------------------------|-----------------------------------------------------------|------|------|------|------|------|------|------|------|------|------|------|------|------|------|------|------|------|------|------|
|                          | WW                                                        | WB   | WH   | WA   | WM   | BW   | BB   | BH   | BA   | BM   | HW   | HB   | HH   | HA   | HM   | AW   | AB   | AH   | AA   | AM   |
|                          | Column Percent                                            |      |      |      |      |      |      |      |      |      |      |      |      |      |      |      |      |      |      |      |
| <i>Age</i>               |                                                           |      |      |      |      |      |      |      |      |      |      |      |      |      |      |      |      |      |      |      |
| < 20                     | 6.0                                                       | 13.9 | 12.6 | 5.2  | 27.1 | 10.5 | 13.4 | 17.2 | 10.4 | 28.4 | 7.5  | 16.7 | 13.5 | 10.8 | 27.0 | 2.1  | 8.1  | 10.0 | 2.5  | 16.6 |
| 20–29                    | 51.4                                                      | 60.4 | 56.6 | 45.1 | 56.4 | 54.2 | 56.1 | 58.5 | 54.1 | 56.4 | 50.8 | 60.4 | 57.6 | 54.1 | 54.7 | 34.5 | 52.1 | 50.4 | 43.7 | 53.6 |
| 30–39                    | 40.3                                                      | 24.1 | 29.0 | 46.3 | 15.2 | 32.5 | 28.5 | 22.8 | 32.7 | 14.3 | 39.1 | 21.7 | 27.1 | 33.1 | 17.0 | 58.2 | 36.7 | 36.9 | 50.7 | 26.9 |
| ≥ 40                     | 2.3                                                       | 1.6  | 1.8  | 3.5  | 1.3  | 2.7  | 2.0  | 1.5  | 2.8  | 1.0  | 2.7  | 1.3  | 1.8  | 2.1  | 1.3  | 5.3  | 3.0  | 2.8  | 3.1  | 2.8  |
| <i>Education</i>         |                                                           |      |      |      |      |      |      |      |      |      |      |      |      |      |      |      |      |      |      |      |
| 0–8 years                | 1.4                                                       | 1.4  | 2.0  | 0.7  | 4.1  | 0.9  | 1.7  | 1.3  | 0.9  | 3.0  | 2.2  | 1.9  | 22.8 | 2.2  | 20.3 | 1.0  | 1.2  | 1.3  | 5.2  | 11.2 |
| 9–11 years               | 8.0                                                       | 17.2 | 16.0 | 5.8  | 30.4 | 11.0 | 15.8 | 17.6 | 9.9  | 34.3 | 10.4 | 20.3 | 27.5 | 12.8 | 37.6 | 3.1  | 8.5  | 9.7  | 6.6  | 21.8 |
| HS grad                  | 29.5                                                      | 37.7 | 34.2 | 22.6 | 40.6 | 30.9 | 37.9 | 35.6 | 30.1 | 41.3 | 30.6 | 37.6 | 29.2 | 35.5 | 28.9 | 17.8 | 32.6 | 30.2 | 21.1 | 36.2 |
| Some college             | 26.2                                                      | 28.2 | 27.0 | 26.0 | 19.4 | 33.0 | 28.6 | 31.9 | 34.1 | 18.1 | 30.2 | 29.5 | 14.0 | 29.2 | 10.9 | 24.0 | 32.3 | 30.5 | 18.7 | 19.0 |
| College grad             | 22.4                                                      | 9.9  | 13.0 | 24.9 | 3.6  | 14.8 | 10.5 | 9.0  | 15.3 | 2.5  | 16.6 | 7.3  | 4.2  | 12.7 | 1.6  | 31.3 | 17.3 | 18.9 | 27.1 | 7.9  |
| More than college        | 12.5                                                      | 5.5  | 7.8  | 20.1 | 1.9  | 9.5  | 5.5  | 4.6  | 9.7  | 0.9  | 10.0 | 3.5  | 2.2  | 7.6  | 0.7  | 22.7 | 8.2  | 9.5  | 21.3 | 3.9  |
| <i>Nativity</i>          |                                                           |      |      |      |      |      |      |      |      |      |      |      |      |      |      |      |      |      |      |      |
| Native born              | 94.5                                                      | 95.1 | 94.1 | 89.9 | 96.6 | 85.5 | 86.2 | 89.3 | 78.3 | 94.5 | 69.0 | 77.0 | 33.0 | 69.7 | 47.7 | 30.6 | 34.7 | 47.2 | 10.7 | 27.1 |
| Foreign born             | 5.5                                                       | 5.0  | 5.9  | 10.2 | 3.4  | 14.5 | 13.8 | 10.7 | 21.7 | 5.5  | 31.0 | 23.0 | 67.0 | 30.3 | 52.3 | 69.4 | 65.3 | 52.8 | 89.4 | 72.9 |
| <i>Marital status</i>    |                                                           |      |      |      |      |      |      |      |      |      |      |      |      |      |      |      |      |      |      |      |
| Married                  | 85.5                                                      | 43.3 | 65.9 | 82.8 | 8.3  | 61.0 | 47.2 | 42.4 | 60.4 | 2.4  | 76.5 | 39.6 | 60.7 | 65.3 | 5.4  | 90.1 | 62.8 | 65.8 | 91.2 | 12.5 |
| Unmarried                | 14.5                                                      | 56.7 | 34.1 | 17.2 | 91.6 | 39.1 | 52.8 | 57.6 | 39.7 | 97.6 | 23.5 | 60.4 | 39.3 | 34.7 | 94.7 | 9.9  | 37.2 | 34.2 | 8.8  | 87.5 |
| <i>Parity</i>            |                                                           |      |      |      |      |      |      |      |      |      |      |      |      |      |      |      |      |      |      |      |
| Nalliparous              | 41.2                                                      | 42.3 | 42.3 | 45.2 | 54.0 | 44.3 | 36.8 | 43.7 | 44.0 | 41.1 | 43.4 | 42.4 | 34.2 | 42.8 | 45.6 | 49.5 | 44.7 | 47.1 | 45.3 | 52.7 |
| Primiparous              | 34.7                                                      | 30.8 | 31.6 | 32.9 | 24.4 | 30.9 | 30.8 | 29.2 | 31.0 | 26.8 | 33.2 | 29.7 | 30.8 | 31.8 | 25.0 | 33.7 | 30.8 | 31.1 | 35.7 | 25.1 |
| Multiparous              | 24.1                                                      | 26.9 | 26.1 | 21.9 | 21.6 | 24.8 | 32.5 | 27.1 | 25.0 | 32.1 | 23.4 | 27.9 | 35.0 | 25.4 | 29.4 | 16.8 | 24.5 | 21.8 | 19.0 | 22.3 |

<sup>1</sup>Note: In column headers, the first letter is for maternal race/ethnicity and the second letter is for paternal race/ethnicity. W=white; B=black; H=Hispanic; A=Asian and M=missing.

**Table S2.** Multivariate adjusted<sup>1</sup> predicted probabilities and 95% confidence intervals (95% CI) for preterm birth and small for gestational age, by maternal and paternal race/ethnicity.

| Maternal race/ethnicity | Paternal race/ethnicity | PTB                   |            | SGA                   |            |
|-------------------------|-------------------------|-----------------------|------------|-----------------------|------------|
|                         |                         | Predicted probability | 95% CI     | Predicted probability | 95% CI     |
| NHW                     | NHW                     | 0.08                  | 0.05, 0.11 | 0.07                  | 0.05, 0.12 |
|                         | NHB                     | 0.10                  | 0.06, 0.13 | 0.09                  | 0.07, 0.15 |
|                         | Hispanic                | 0.09                  | 0.05, 0.12 | 0.09                  | 0.06, 0.14 |
|                         | Asian                   | 0.07                  | 0.04, 0.10 | 0.10                  | 0.07, 0.16 |
|                         | Missing                 | 0.11                  | 0.07, 0.16 | 0.12                  | 0.09, 0.19 |
| NHB                     | NHW                     | 0.12                  | 0.07, 0.16 | 0.11                  | 0.08, 0.18 |
|                         | NHB                     | 0.14                  | 0.09, 0.19 | 0.13                  | 0.10, 0.21 |
|                         | Hispanic                | 0.13                  | 0.08, 0.18 | 0.13                  | 0.10, 0.21 |
|                         | Asian                   | 0.12                  | 0.07, 0.16 | 0.14                  | 0.10, 0.22 |
|                         | Missing                 | 0.17                  | 0.11, 0.23 | 0.16                  | 0.11, 0.25 |
| Hispanic                | NHW                     | 0.09                  | 0.05, 0.13 | 0.08                  | 0.05, 0.13 |
|                         | NHB                     | 0.12                  | 0.07, 0.16 | 0.10                  | 0.07, 0.17 |
|                         | Hispanic                | 0.10                  | 0.06, 0.14 | 0.09                  | 0.07, 0.15 |
|                         | Asian                   | 0.09                  | 0.05, 0.13 | 0.11                  | 0.08, 0.18 |
|                         | Missing                 | 0.12                  | 0.08, 0.17 | 0.11                  | 0.08, 0.18 |
| Asian                   | NHW                     | 0.10                  | 0.06, 0.13 | 0.08                  | 0.06, 0.14 |
|                         | NHB                     | 0.12                  | 0.08, 0.17 | 0.11                  | 0.08, 0.17 |
|                         | Hispanic                | 0.12                  | 0.07, 0.16 | 0.11                  | 0.08, 0.18 |
|                         | Asian                   | 0.09                  | 0.05, 0.12 | 0.14                  | 0.10, 0.22 |
|                         | Missing                 | 0.14                  | 0.08, 0.18 | 0.14                  | 0.10, 0.22 |

<sup>1</sup>Note: Adjusted model includes fixed effect covariates (birth year, state).

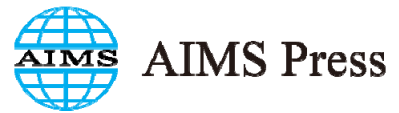

© 2018 the Authors, licensee AIMS Press. This is an open access article distributed under the terms of the Creative Commons Attribution License (<http://creativecommons.org/licenses/by/4.0>)
